# Supplementary material
Source: publisher figshare collection journal article supplement (https://acs.figshare.com/ndownloader/files/14804138)
Supplement: Supplementary file 1 [file 14804138]

# Supporting Information

## ***Operando* Unraveling the Structural/Chemical Stability of P-substituted CoSe<sub>2</sub> Electrocatalysts toward Hydrogen/Oxygen Evolution Reactions in Alkaline Electrolyte**

Yanping Zhu,<sup>1†</sup> Hsiao-Chien Chen,<sup>1,2†</sup> Chia-Shuo Hsu,<sup>1</sup> Ting-Sheng Lin,<sup>1</sup> Chia-Jui Chang,<sup>1</sup> Sung-Chun Chang,<sup>3</sup> Li-Duan Tsai,<sup>3</sup> Hao Ming Chen<sup>1\*</sup>

<sup>1</sup>Department of Chemistry, National Taiwan University, Taipei 106, Taiwan

<sup>2</sup>Center of Applied Nanomedicine, National Cheng Kung University, No. 1, University Rd., Tainan 70101, Taiwan.

<sup>3</sup>Materials Chemical Research Laboratories, Industrial Technology Research Institute, Chutung 310, Taiwan.

<sup>†</sup>Contribution equally

### **1. Experimental Details**

#### **1.1 Materials Preparation**

*Synthesis of cobalt hydroxide carbonate hydrate (CHCH, Co(OH)(CO<sub>3</sub>)<sub>0.5</sub>·xH<sub>2</sub>O nanowires).* In a typical synthesis, the pretreated carbon cloth (CC, 2.5 cm × 1 cm) was perpendicularly immersed into a precursor solution (10 mL) containing 0.625 g of urea and 0.437 g of Co(NO<sub>3</sub>)<sub>3</sub>·6H<sub>2</sub>O. The immersion depth was kept as 1 cm. Then the aqueous solution and CC were heated at 90 °C for 6 h. After cooling, the CHCH/CC was obtained after being washed with deionized water and dried under vacuum.

*Synthesis of phosphorus-substituted cobalt selenide.* In a typical synthesis of CoSe<sub>1.26</sub>P<sub>1.42</sub>, 0.075 g of NaH<sub>2</sub>PO<sub>2</sub>, 0.06 g of selenium powder and the as-prepared CHCH/CC precursor were placed separately in a glass tube before being heated in a tube furnace at 400 °C for 3 h under a 5% H<sub>2</sub>/Ar atmosphere with a temperature ramp of 4 °C min<sup>-1</sup>. For the synthesis of *c*-CoSe<sub>2</sub>, CoSe<sub>2.01</sub>P<sub>0.49</sub>, CoSe<sub>1.64</sub>P<sub>0.54</sub> and CoSe<sub>0.45</sub>P<sub>1.18</sub>,

different amounts of  $\text{NaH}_2\text{PO}_2$  (0, 0.025, 0.05 and 0.1 g, respectively) were introduced while keeping other parameters unchanged.

## **1.2 Structure characterization.**

The crystallographic information of the samples was evaluated through powder X-ray diffraction (PXRD) analysis (the incident X-ray wavelength of 0.7749 Å) using a large Debye-Scherrer camera in BL-01C2 at National Synchrotron Radiation Research Center (NSRRC, Hsinchu, Taiwan) in which the electron storage ring was operating at 1.5 GeV with a beam current of 360 mA. The XRD patterns were calibrated by  $\text{CeO}_2$  standard and altered to that with wavelength of 1.5413 Å using the software “Winplot”. The microstructure images were observed with field-emission scanning electron microscope (FE-SEM, JEOL JSM-6700F), transmission electron microscope (TEM) and high-resolution transmission electron microscope (HR-TEM) (JEOL-2100F). Inductively coupled plasma mass spectrometry (ICP-MS) was performed on iCAP-RQ instrument (Thermo Fisher). Typically, the samples were dissolved in 2 wt%  $\text{HNO}_3$  and the ion concentration is kept less than 50 ppb. X-ray absorption spectroscopy at Co K-edge were collected in total-fluorescence-yield mode at ambient air in BL-01C1 at NSRRC. The scan range was kept in an energy range of 7600-8300 eV for Co K-edge. The spectra were obtained after subtracting the baseline of pre-edge and normalizing that of post-edge. In situ Raman spectra were recorded by UniNano UNIDRON. A Raman microscopy system, employing a diode laser at 532 nm. A 50× objective lens was used to focus the laser on the sample, in which the size of laser spot is 1 μm. Meanwhile the Raman spectrum measurement was performed under an exposure time of 2 s and an accumulation number of 5 times by illuminating 2.5 mW laser power.

## **1.3 Electrochemical measurements.**

Electrochemical performance was assessed on a Bio-Logic SP-300 workstation at RT. All tests were carried out in 1 M potassium hydroxide (KOH) electrolyte in a conventional three-electrode configuration. Reference electrode: saturated calomel electrode (SCE). Counter electrode: graphite rod for HER and platinum plate for OER. Working electrode: the as-prepared catalysts. All the potentials reported were

referenced vs reversible hydrogen electrode (RHE) according to the equation with IR compensation:  $E(\text{RHE}) = E(\text{SCE}) + 0.059 \times \text{pH} + 0.240$ . The working area of electrodes was fixed as  $0.5 \text{ cm}^2$ . For the HER test, Polarization curves were recorded using linear sweep voltammetry (LSV) from  $-0.8$  to  $-1.6 \text{ V}$  (vs SCE) at a sweep rate of  $5 \text{ mV s}^{-1}$ . The cyclic voltammograms (CVs) obtained with different rates from  $2$  to  $10 \text{ mV s}^{-1}$  in the potential range of  $-0.4$  -  $-0.45 \text{ V}$  (vs. RHE) were recorded to calculate the electrochemical double-layer capacitances (EDLCs),  $C_{\text{dl}}$ . The long-term stability was tested under a static overpotential of  $92 \text{ mV}$  for  $15$  hours. For the OER test, LSV was recorded under the potential window ranged from  $0$  to  $0.8 \text{ V}$  (vs SCE) and the scanning rate was  $0.5 \text{ mV s}^{-1}$ . The overpotential ( $\eta$ ) was obtained based on the equation:  $E(\text{RHE}) - 1.23 \text{ V} = \eta \text{ (V)}$ . Cyclic voltammograms (CVs) tests were carried out in the potential window of  $0.15$  -  $0.2 \text{ V}$  (vs. SCE) with different sweeping rates from  $0.2$  to  $1 \text{ mV s}^{-1}$  to calculate EDLCs,  $C_{\text{dl}}$ . The long-term stability was tested under a static overpotential of  $255 \text{ mV}$  for  $15$  hours.

#### 1.4 *In-Situ* X-ray absorption spectroscopy analysis

The measurement in a typical three-electrode setup as the same condition in electrochemical characterization case was performed in a specially designed Teflon container with a window sealed by Kapton tape. X-ray was allowed to transmit through the tape and electrolyte, so that the signal of X-ray absorption spectroscopy could be collected in total-fluorescence-yield mode in TPS BL-44A in NSRRC.

## 2. Supplementary Results

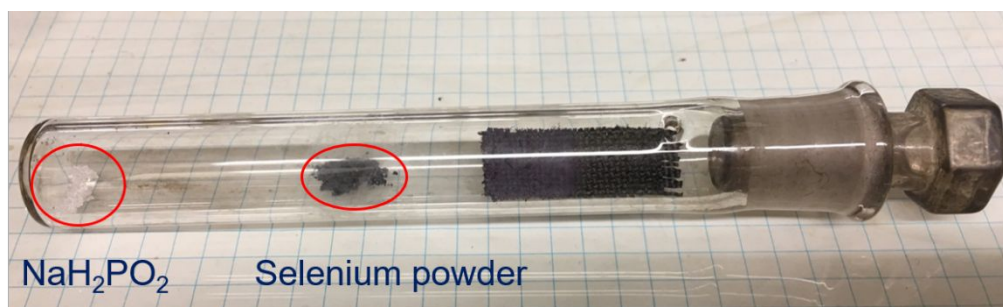

**Figure S1** Photograph of the synthesis of the P-substituted  $\text{CoSe}_2$  nanostructures on CC.

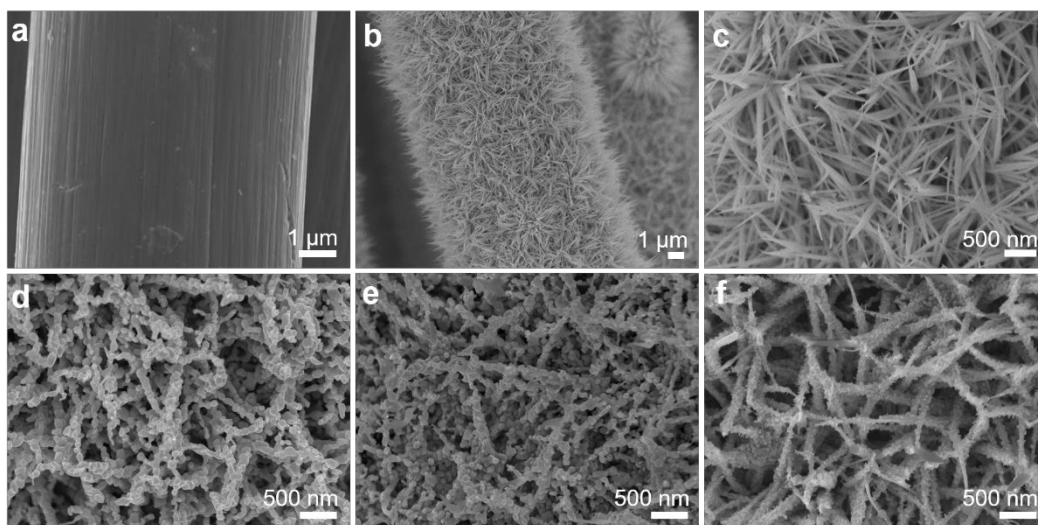

**Figure S2** (a) SEM image of bare CC. (b) Low and (c) high magnification SEM images of the CHCH precursor. SEM images of (d)  $\text{CoSe}_{2.01}\text{P}_{0.49}$ , (e)  $\text{CoSe}_{1.64}\text{P}_{0.54}$  and (f)  $\text{CoSe}_{0.45}\text{P}_{1.18}$ .

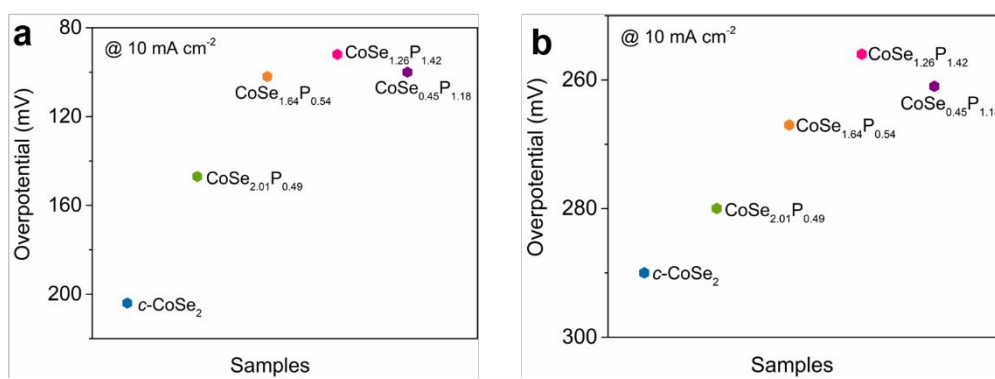

**Figure S3.** Volcano plots obtained from (a) HER and (b) OER performance of the catalysts.

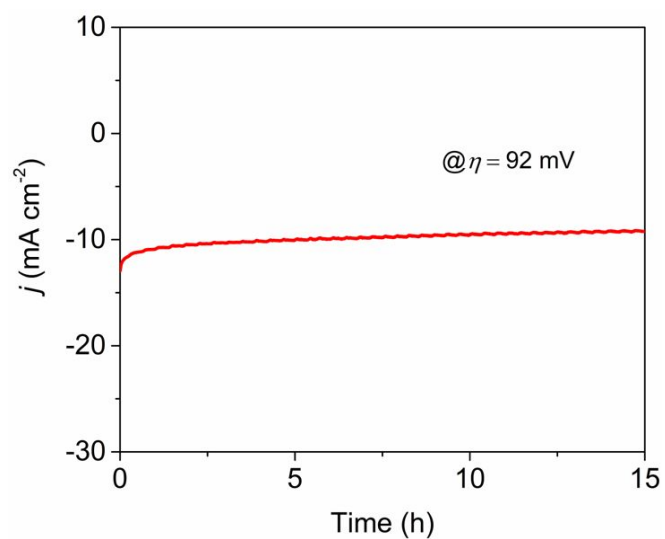

**Figure S4.** Current density as a function of time for  $\text{CoSe}_{1.26}\text{P}_{1.42}$  at a constant cathodic potential of 92 mV toward HER.

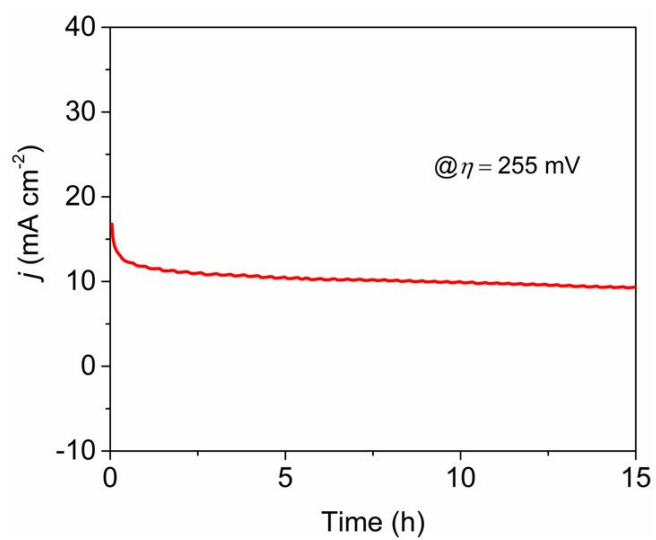

**Figure S5.** Current density as a function of time for  $\text{CoSe}_{1.26}\text{P}_{1.42}$  at a constant overpotential of 255 mV toward OER.

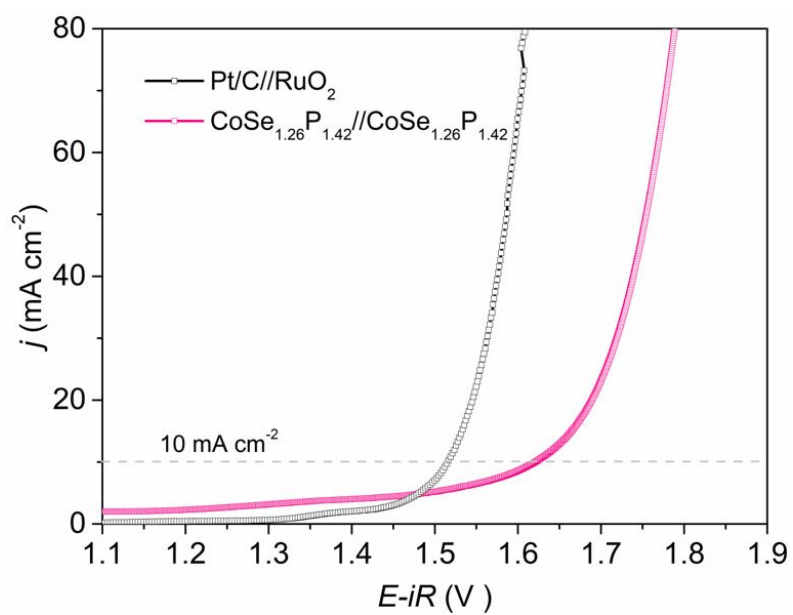

**Figure S6.** (a) Polarization curves of CoSe<sub>1.26</sub>P<sub>1.42</sub>//CoSe<sub>1.26</sub>P<sub>1.42</sub> and Pt/C//RuO<sub>2</sub> for overall water splitting in 1 M KOH.

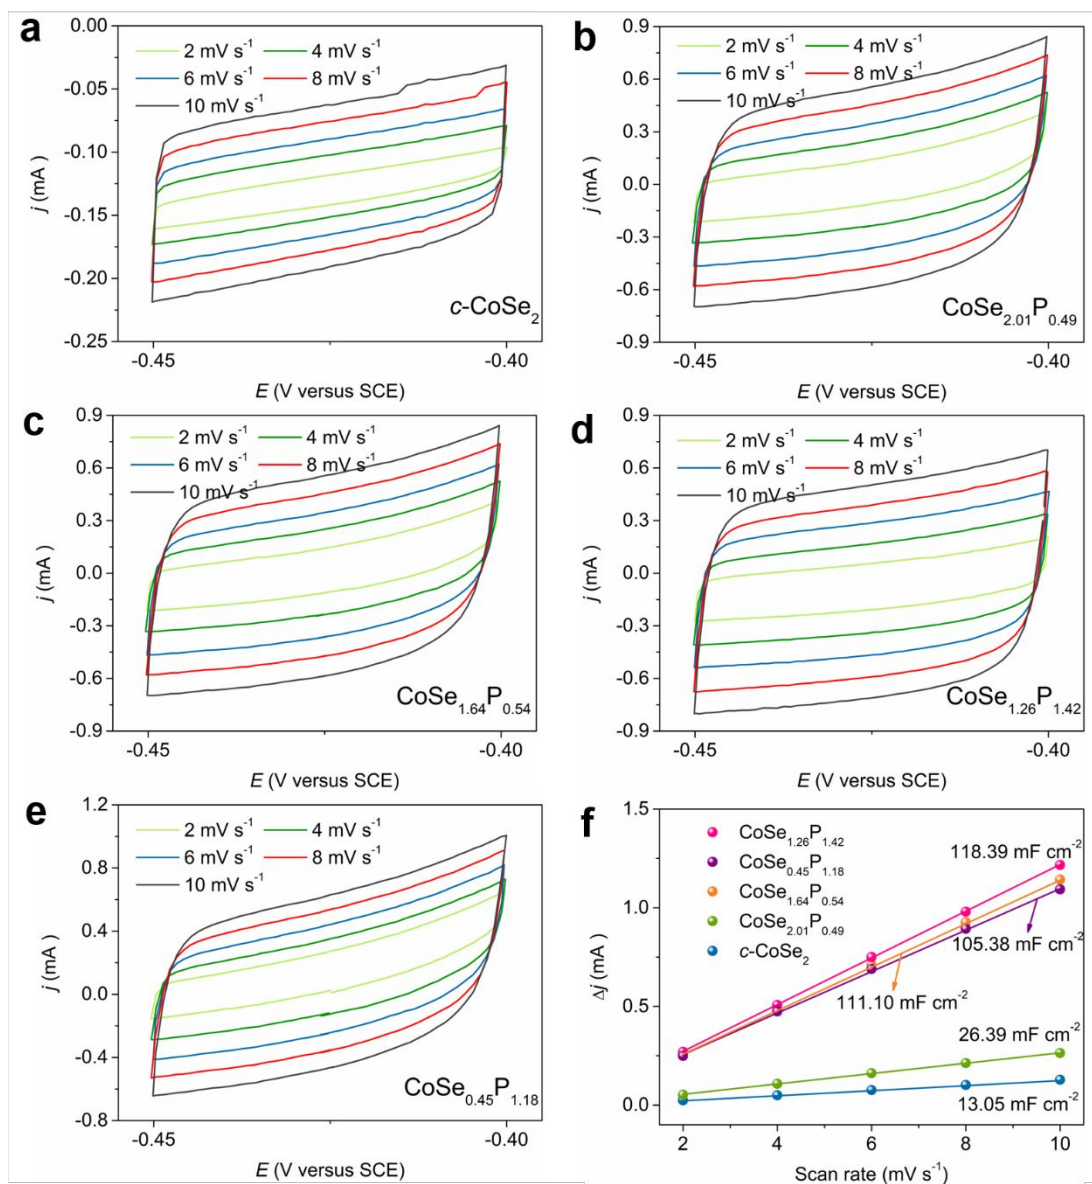

**Figure S7.** CV curves recorded for (a)  $c\text{-CoSe}_2$ , (b)  $\text{CoSe}_{2.01}\text{P}_{0.49}$ , (c)  $\text{CoSe}_{1.64}\text{P}_{0.54}$ , (d)  $\text{CoSe}_{1.26}\text{P}_{1.42}$  and (e)  $\text{CoSe}_{0.45}\text{P}_{1.18}$  catalysts at 2 - 10  $\text{mV S}^{-1}$  in the potential range of -0.45 V ~ -0.40 V SCE. (f) The corresponding linear fitting of the capacitive currents versus CV scans.



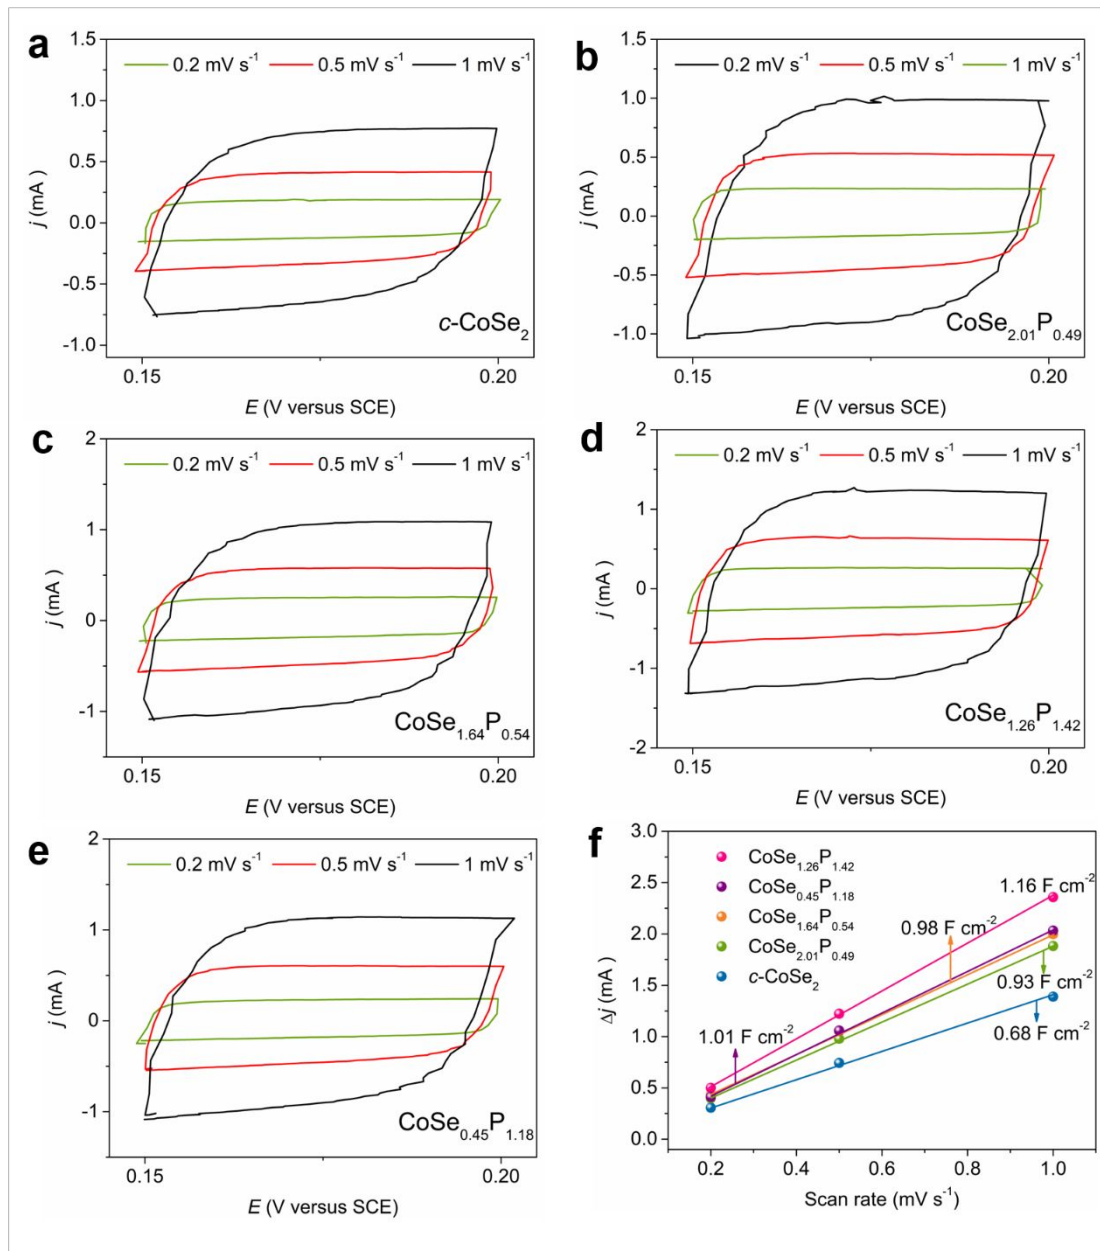

**Figure S8.** CV curves recorded for (a)  $c\text{-CoSe}_2$ , (b)  $\text{CoSe}_{2.01}\text{P}_{0.49}$ , (c)  $\text{CoSe}_{1.64}\text{P}_{0.54}$ , (d)  $\text{CoSe}_{1.26}\text{P}_{1.42}$  and (e)  $\text{CoSe}_{0.45}\text{P}_{1.18}$  catalysts at 0.2 ~ 1  $\text{mV s}^{-1}$  in the potential range of 0.15 V ~ 0.2 V SCE. (f) The corresponding linear fitting of the capacitive currents versus CV scans.



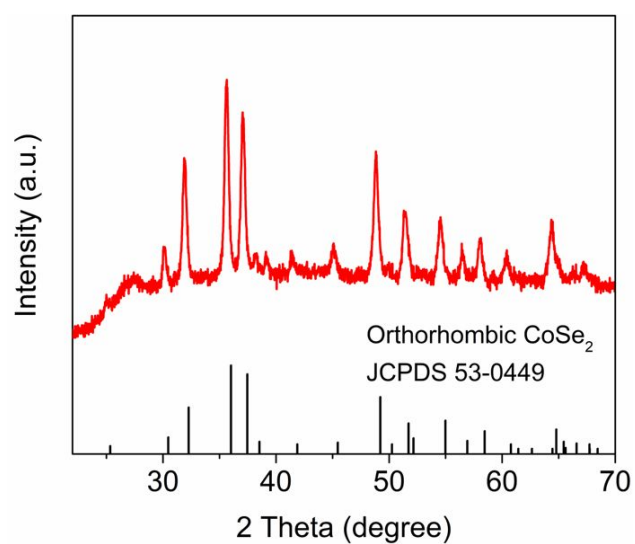

**Figure S9.** XRD pattern of the  $o\text{-CoSe}_2$ .

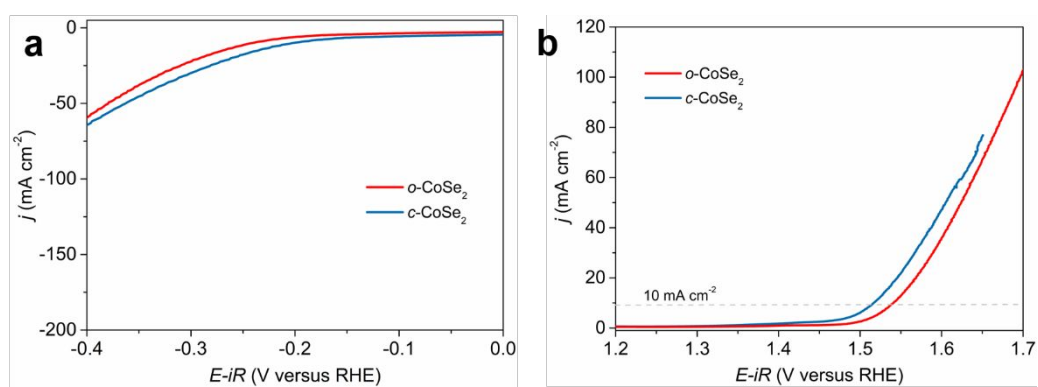

**Figure S10.** Electrochemical activity comparison between the  $o\text{-CoSe}_2$  and  $c\text{-CoSe}_2$  electrode: LSV polarization curves for (a) HER and (b) OER.

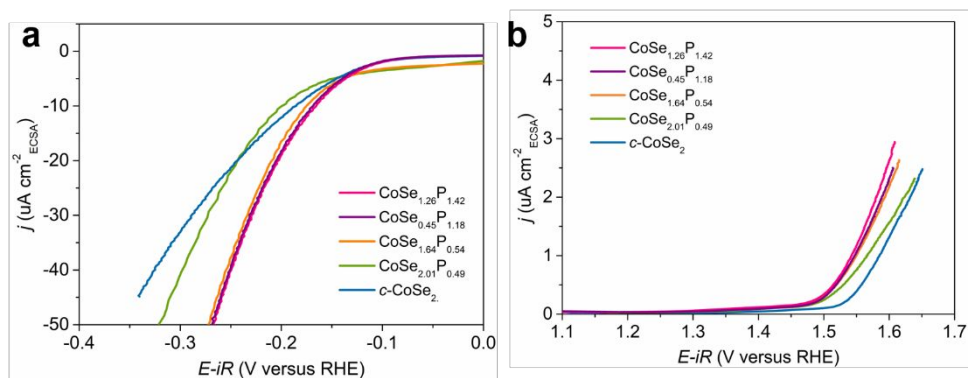

**Figure S11.** (a) HER and (b) OER polarization curves of the catalysts normalized by ECSA.

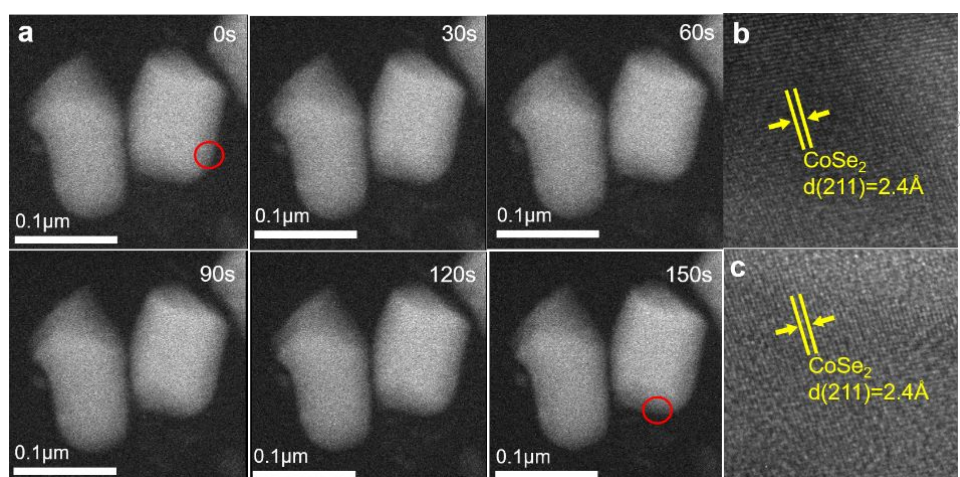

**Figure S12.** (a) *In-situ* STEM images of the c-CoSe<sub>2</sub> catalyst taken at different times after immersing into the KOH solution. HRTEM images of the selected region of (b) initial and (c) final state of the c-CoSe<sub>2</sub>.

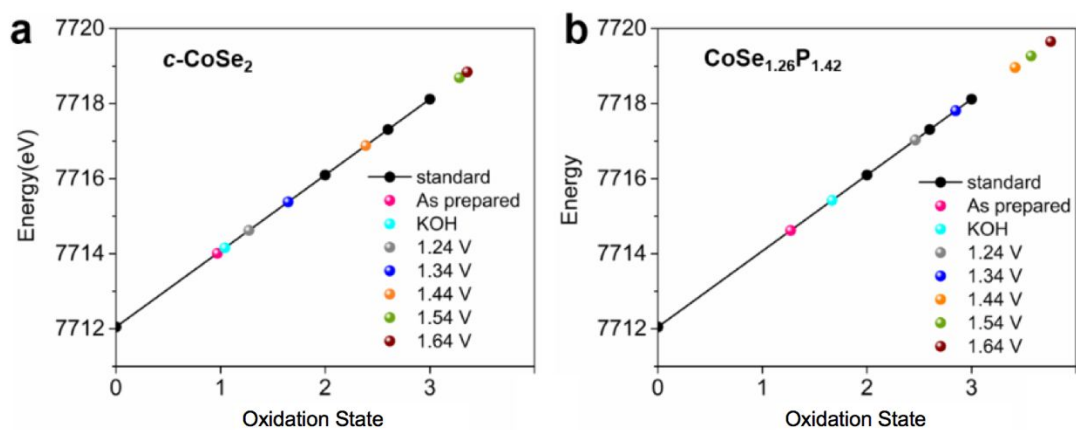

**Figure S13.** The oxidation states of cobalt of (a)  $c\text{-CoSe}_2$  and (b)  $\text{CoSe}_{1.26}\text{P}_{1.42}$  at various potentials for the OER process.

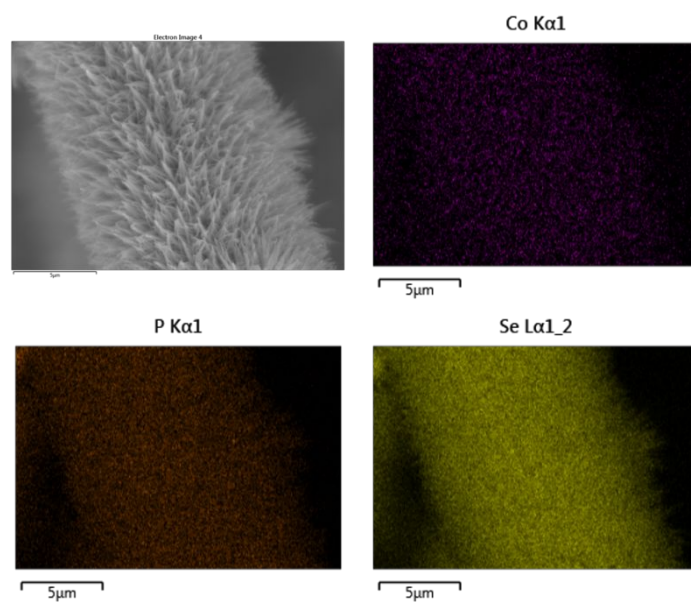

**Figure S14.** EDX elemental mapping of the as-prepared  $\text{CoSe}_{1.26}\text{P}_{1.42}$ .

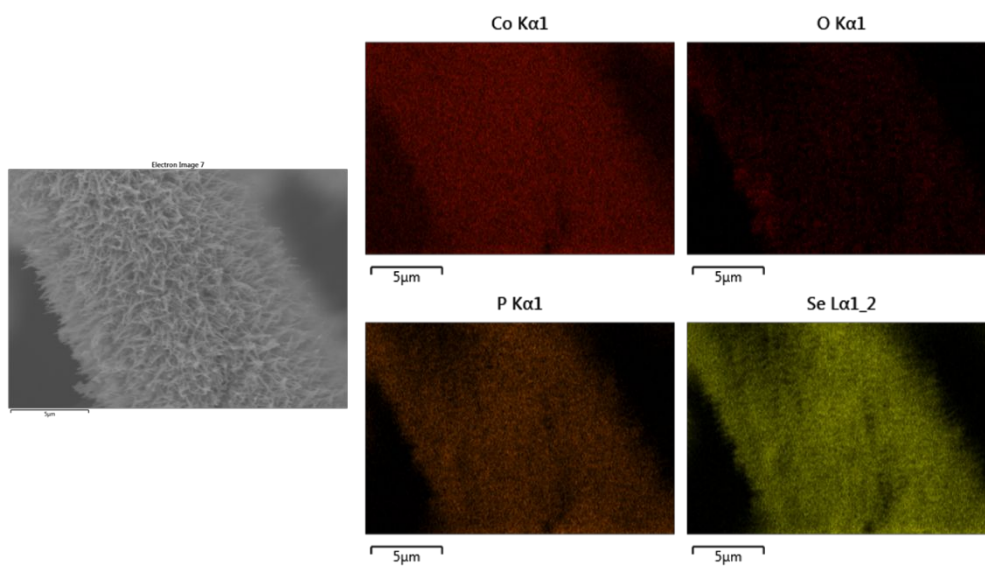

**Figure S15.** EDX elemental mapping of the  $\text{CoSe}_{1.26}\text{P}_{1.42}$  after HER.

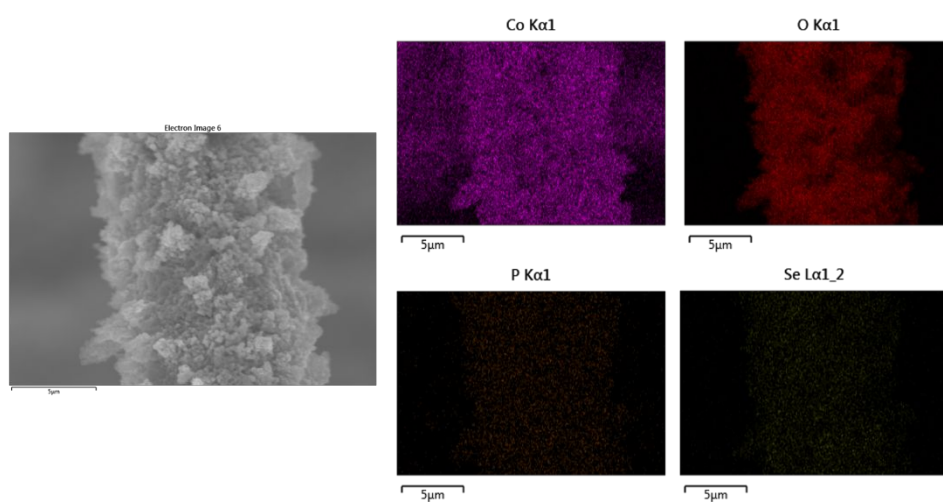

**Figure S16.** EDX elemental mapping of the  $\text{CoSe}_{1.26}\text{P}_{1.42}$  after OER.

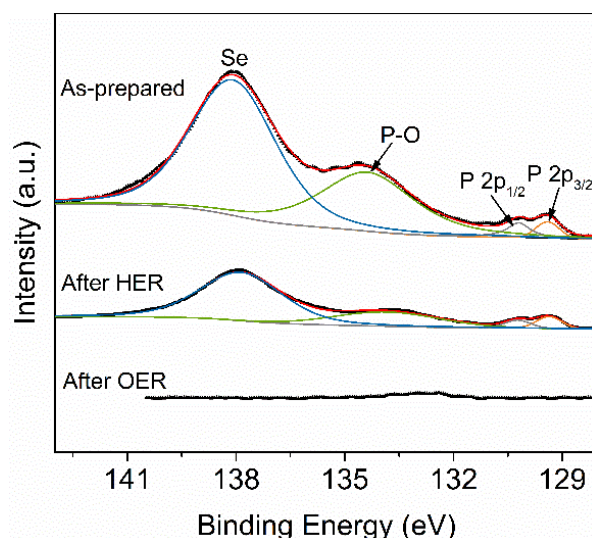

**Figure S17.** XPS spectra of P 2p of the CoSe<sub>1.26</sub>P<sub>1.42</sub> before and after HER/OER.

For the P 2p spectrum of the as-prepared CoSe<sub>1.26</sub>P<sub>1.42</sub>, the peaks at 129.4 and 130.2 eV reflect the binding energies of P 2P<sub>3/2</sub> and P 2P<sub>1/2</sub>, respectively. The peak at 134.4 eV is assigned to the surface PO<sub>4</sub> due to the air exposure (*J. Mater. Chem. A*, **2016**, 4, 4686-4690), which may affect the resultant coordination numbers of Co. The additional peak located at 187.1 eV represents the Auger Se.

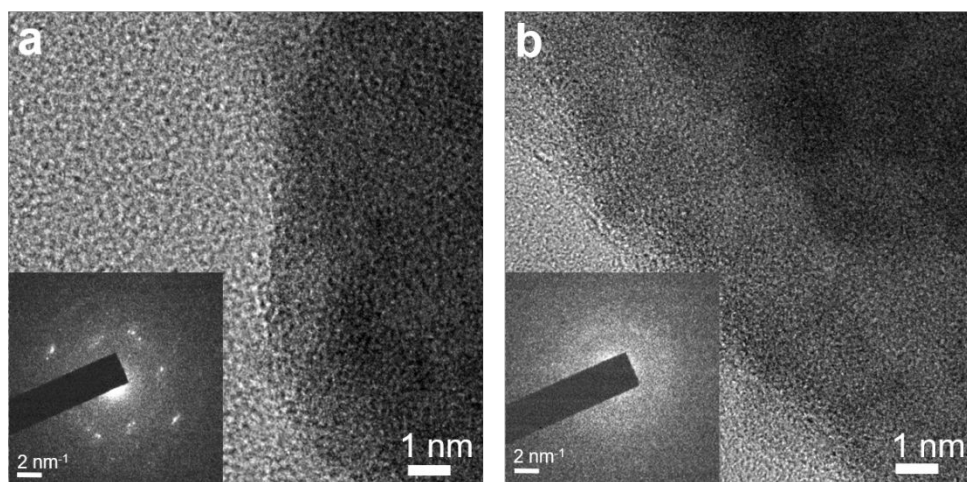

**Figure S18.** TEM images of the CoSe<sub>1.26</sub>P<sub>1.42</sub> catalyst after (a) HER and (b) OER stability test. Insets are the corresponding SAED pattern.



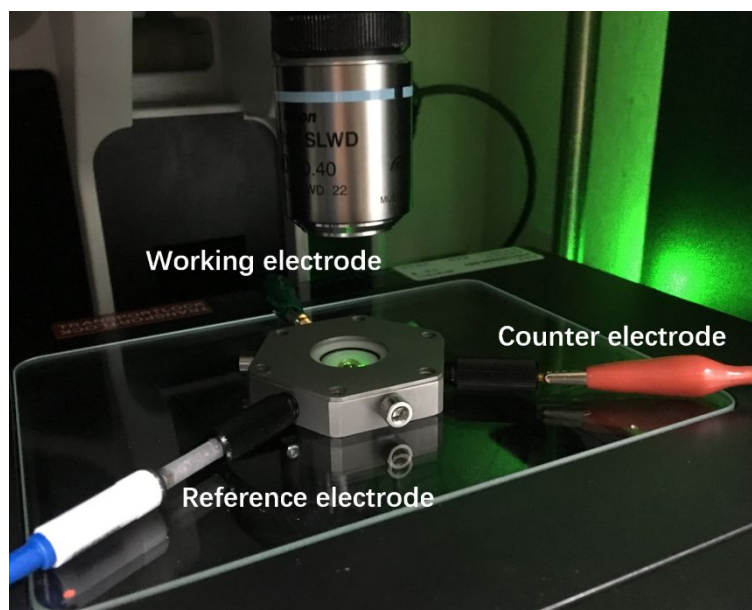

**Figure S19.** Digital photograph of the chemical cell for using in *in-situ* Raman measurement.

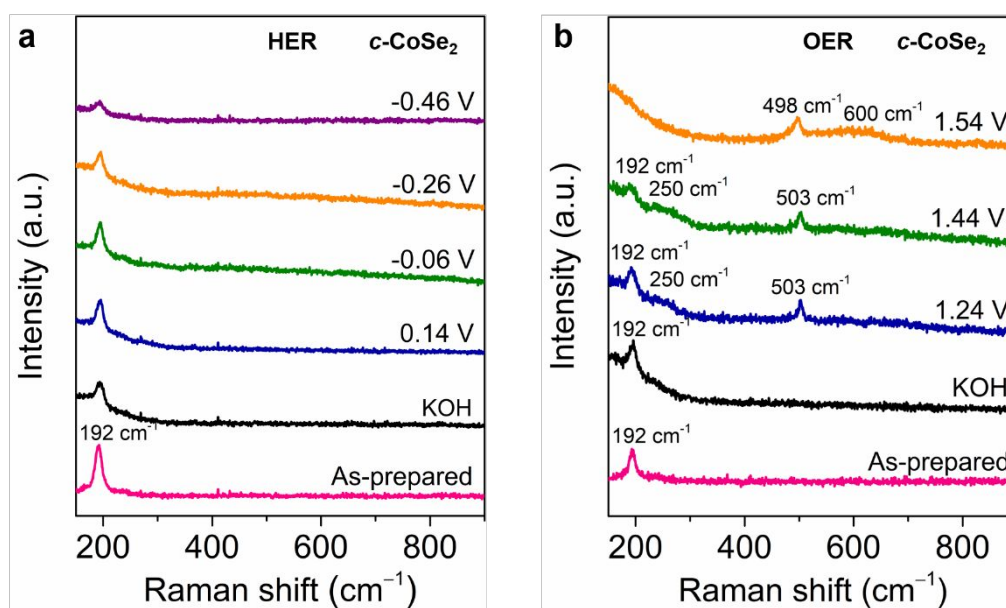

**Figure S20.** *In-situ* Raman spectra of the  $c\text{-CoSe}_2$  catalyst at various potentials for (a) HER and (b) OER process.

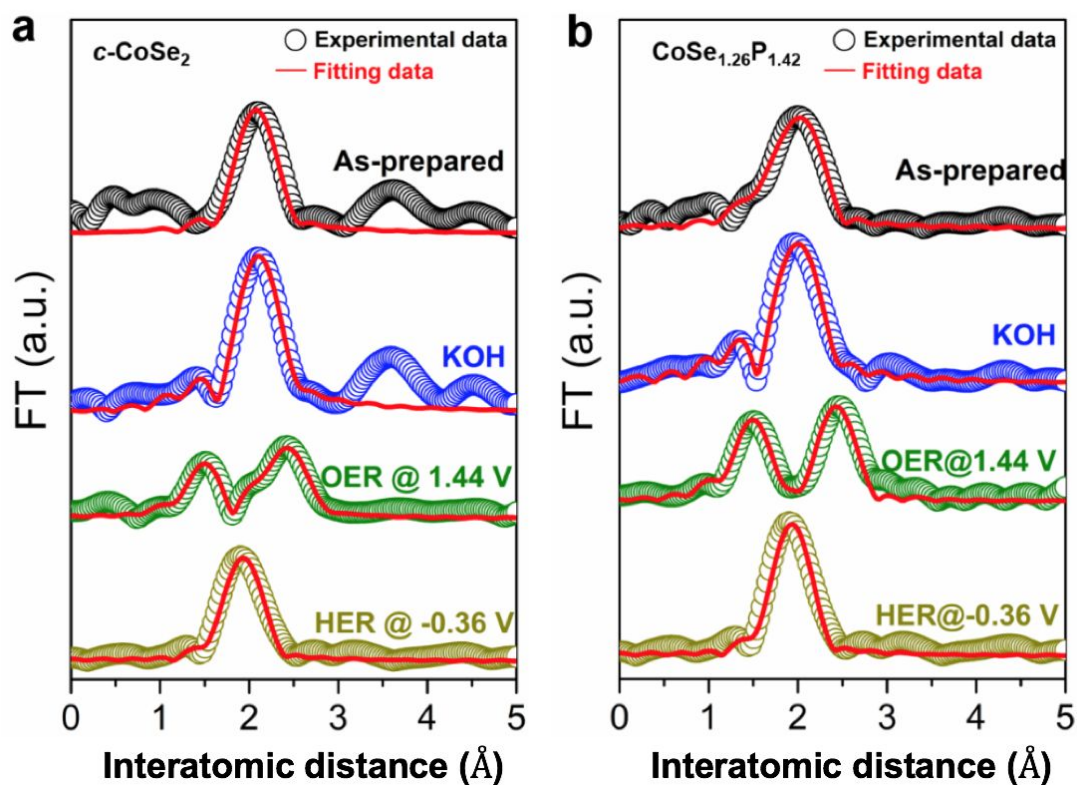

**Figure S21.** *In-situ* EXAFS r-space spectra of (a)  $c\text{-CoSe}_2$  and (b)  $\text{CoSe}_{1.26}\text{P}_{1.42}$  catalysts for HER and OER process. (experimental data; color circle) and the corresponding fitting (red line).

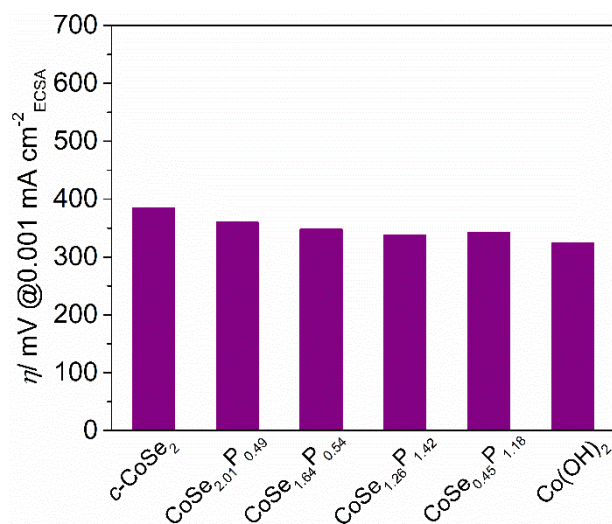

**Figure S22.** ECSA normalized activity of all samples and reference  $\text{Co(OH)}_2$ .



**Table S1.** Compositions of the samples determined from ICP-MS.

| Samples                                | The mole ratios of metal ions |      |      |
|----------------------------------------|-------------------------------|------|------|
|                                        | Co                            | Se   | P    |
| <i>c</i> -CoSe <sub>2</sub>            | 1                             | 2.13 | /    |
| CoSe <sub>2.01</sub> P <sub>0.49</sub> | 1                             | 2.01 | 0.49 |
| CoSe <sub>1.64</sub> P <sub>0.54</sub> | 1                             | 1.64 | 0.54 |
| CoSe <sub>1.26</sub> P <sub>1.42</sub> | 1                             | 1.26 | 1.42 |
| CoSe <sub>0.45</sub> P <sub>1.18</sub> | 1                             | 0.45 | 1.18 |

**Table S2.** Comparison of electrocatalytic HER activity in alkaline media (1 M KOH) for CoSe<sub>1.26</sub>P<sub>1.42</sub> with some of the most active non-precious HER catalysts ever reported.

| Catalyst                               | Substrate | $\eta_{10}$ (mV) | Tafel slope<br>(mV dec <sup>-1</sup> ) | Reference |
|----------------------------------------|-----------|------------------|----------------------------------------|-----------|
| CoSe <sub>1.26</sub> P <sub>1.42</sub> | CC        | 92               | 90                                     | This work |
| CoP                                    | CC        | 41               | 43                                     | [1]       |
| NiS <sub>2</sub>                       | CC        | 149              | 104                                    | [2]       |
| MoP-NC/MoP-C                           | CC        | 69               | 50                                     | [3]       |
| Ni-thiolate                            | CC        | 80               | 70                                     | [4]       |
| Ni/NiO                                 | Ni Foam   | 146              | 72                                     | [5]       |
| Ni-Fe-P                                | Ni Foam   | 79               | 93                                     | [6]       |
| Co/Co <sub>2</sub> P                   | Ni Foam   | 124              | 60                                     | [7]       |
| Pr <sub>0.5</sub> BSCF                 | GCE       | 237              | 45                                     | [8]       |
| o-CoSe <sub>2</sub>  P                 | GCE       | 104              | 69                                     | [9]       |
| Ni <sub>3</sub> Mo <sub>2</sub> C-PC   | GCE       | 169              | 101                                    | [10]      |
| CoO <sub>x</sub> @CN                   | GCE       | 235              | 115                                    | [11]      |

**Table S3.** Comparison of electrocatalytic OER activity in alkaline media (1 M KOH) for CoSe<sub>1.26</sub>P<sub>1.42</sub> with some of the most active non-precious OER catalysts ever reported.

| Catalyst                                       | Substrate | $\eta_{10}$ (mV) | Tafel slope (mV dec <sup>-1</sup> ) | Reference |
|------------------------------------------------|-----------|------------------|-------------------------------------|-----------|
| CoSe <sub>1.26</sub> P <sub>1.42</sub>         | CC        | 255              | 87                                  | This work |
| CoSe <sub>0.85</sub>                           | CC        | 324              | 85                                  | [12]      |
| NiCoPS                                         | CC        | 230              | 45                                  | [13]      |
| NiCoP                                          | CC        | 242              | 64                                  | [14]      |
| Ni <sub>3</sub> S <sub>2</sub>                 | Ni foam   | 157              | 59                                  | [15]      |
| FeNi-GO LDH                                    | Ni foam   | 210              | 40                                  | [16]      |
| Ni <sub>2</sub> P                              | Ni foam   | 290              | 59                                  | [17]      |
| p-Cu <sub>1-x</sub> NNi <sub>3-y</sub> /FeNiCu | GCE       | 280              | 52                                  | [18]      |
| Co <sub>4</sub> N                              | GCE       | 330              | 58                                  | [19]      |
| Ni <sub>3</sub> N nanosheets                   | GCE       | 350              | 85                                  | [20]      |
| CoMnP                                          | GCE       | 330              | 61                                  | [21]      |
| SCFW <sub>0.4</sub>                            | GCE       | 296              | 50                                  | [22]      |
| Amorphous CoSe film                            | Ti mesh   | 292              | 69                                  | [23]      |

**Table S4.** Compositions of the catalysts after reaction determined from ICP-MS.

| Samples                                     | The mole ratios of metal ions |      |      |
|---------------------------------------------|-------------------------------|------|------|
|                                             | Co                            | Se   | P    |
| <i>c</i> -CoSe <sub>2</sub> -HER            | 1                             | 0.75 | /    |
| CoSe <sub>1.26</sub> P <sub>1.42</sub> -HER | 1                             | 0.38 | 0.49 |
| <i>c</i> -CoSe <sub>2</sub> -OER            | 1                             | 0.08 | /    |
| CoSe <sub>1.26</sub> P <sub>1.42</sub> -OER | 1                             | 0.03 | 0.11 |

## References

1. Yang, X.; Lu, A.; Zhu, Y.; Hedhili, M.; Min, S.; Huang, K.; Han, Y.; Li, L. CoP Nanosheet Assembly Grown on Carbon Cloth: A Highly Efficient Electrocatalyst for Hydrogen Generation. *Nano Energy* **2015**, *15*, 634-641.
2. Tang, C.; Pu, Z.; Liu, Q.; Asiri, A.; Sun, X. NiS<sub>2</sub> Nanosheets Array Grown on Carbon Cloth as An Efficient 3D Hydrogen Evolution Cathode. *Electrochimica Acta* **2015**, *153*, 508-514.
3. Liu, B.; Li, H.; Cao, B.; Jiang, J.; Gao, R.; Zhang, J. Few Layered N, P Dual-Doped Carbon-Encapsulated Ultrafine MoP Nanocrystal/MoP Cluster Hybrids on Carbon Cloth: An Ultrahigh Active and Durable 3D Self-Supported Integrated Electrode for Hydrogen Evolution Reaction in a Wide pH Range. *Adv. Mater.* **2018**, *28*, 1801527.
4. Hu, C.; Ma, Q.; Hung, S.; Chen, Z.; Ou, D.; Ren, B.; Chen, H.; Fu, G.; Zheng, N. In Situ Electrochemical Production of Ultrathin Nickel Nanosheets for Hydrogen Evolution Electrocatalysis. *Chem* **2017**, *3*, 122-133.
5. Sun, H.; Ma, Z.; Qiu, Y.; Liu, H.; Gao, G. Ni@NiO Nanowires on Nickel Foam Prepared via “Acid Hungry” Strategy: High Supercapacitor Performance and Robust Electrocatalysts for Water Splitting Reaction. *Small* **2018**, *14*, 1800294.
6. Ahn, S.; Manthiram, A. Direct Growth of Ternary Ni-Fe-P Porous Nanorods onto Nickel Foam as A Highly Active, Robust Bi-Functional Electrocatalyst for Overall Water Splitting. *J. Mater. Chem. A* **2017**, *5*, 2496-2503.
7. Masa, J.; Barwe, S.; Andronescu, C.; Sinev, I.; Ruff, A.; Jayaramulu, K.; Elumeeva, K.; Konkana, B.; Cuenya, B.; Schuhmann, W. Low Overpotential Water Splitting Using Cobalt-Cobalt Phosphide Nanoparticles Supported on Nickel Foam. *ACS Energy Lett.* **2016**, *1*, 1192-1198.
8. Xu, X.; Chen, Y.; Zhou, W.; Zhu, Z.; Su, C.; Liu, M.; Shao, Z. A Perovskite Electrocatalyst for Efficient Hydrogen Evolution Reaction. *Adv. Mater.* **2016**, *28*, 6442-6448.
9. Zheng, Y.; Wu, P.; Gao, M.; Zhang, X.; Gao, F.; Ju, H.; Wu, R.; Gao, Q.; You, R.; Huang, W. *et al.* Doping-Induced Structural Phase Transition in Cobalt Diselenide Enables Enhanced Hydrogen Evolution Catalysis. *Nat. Commun.* **2018**, *9*, 2533.
10. Yu, Z.; Duan, Y.; Gao, M.; Lang, C.; Zheng, Y.; Yu, S. A One-Dimensional Porous Carbon-Supported Ni/Mo<sub>2</sub>C Dual Catalyst for Efficient Water Splitting. *Chem. Sci.* **2017**, *8*, 968-973.
11. Jin, H.; Wang, J.; Su, D.; Wei, Z.; Pang, Z.; Wang, Y. In Situ Cobalt-Cobalt Oxide/N-Doped Carbon Hybrids as Superior Bifunctional Electrocatalysts for Hydrogen and Oxygen Evolution. *J. Am. Chem. Soc.* **2015**, *137*, 2688-2694.
12. Xia, C.; Jiang, Q.; Zhao, C.; Hedhili, M.; Alshareef, H. Selenide-Base Electrocatalysts and Scaffolds for Water Oxidation Applications. *Adv. Mater.* **2016**, *28*, 77-85.
13. Li, J.; Xia, Z.; Zhou, X.; Qin, Y.; Ma, Y.; Qu, Y. Quaternary Pyrite-Structured Nickel/Cobalt Phosphosulfide Nanowires on Carbon Cloth as Efficient and Robust Electrodes for Water Electrolysis. *Nano Research* **2017**, *10*, 814-825.

14. Du, C.; Yang, L.; Yang, F.; Cheng, G.; Luo, W. Nest-Like NiCoP for Highly Efficient Overall Water Splitting. *ACS Catal.* **2017**, *7*, 4131-4137.
15. Zhou, W.; Xu, X.; Cao, X.; Huang, X.; Tan, C.; Tian, J.; Liu, H.; Wang, J.; Zhang, H. Ni<sub>3</sub>S<sub>2</sub> Nanorods/Ni Foam Composite Electrode with Low Overpotential for Electrocatalytic Oxygen Evolution. *Energy Environ. Sci.* **2013**, *6*, 2921-2924.
16. Long, X.; Li, J.; Xiao, S.; Yan, K.; Wang, Z.; Chen, H.; Yang, S. A Strongly Coupled Graphene and FeNi Double Hydroxide Hybrid as An Excellent Electrocatalyst for the Oxygen Evolution Reaction. *Angew. Chem. Int. Ed.* **2014**, *126*, 7714-7718.
17. Stern, L.; Feng, L.; Song, F.; Hu, X. Ni<sub>2</sub>P as A Janus Catalyst for Water Splitting: The Oxygen Evolution Activity of Ni<sub>2</sub>P Nanoparticles. *Energy Environ. Sci.* **2015**, *8*, 2347-2351.
18. Zhu, Y.; Chen, G.; Zhong, Y.; Chen, Y.; Ma, N.; Zhou, W.; Shao, Z. A Surface-Modified Antiperovskite as An Electrocatalyst for Water Oxidation. *Nat. Commun.* **2018**, *9*, 2326.
19. Xu, K.; Chen, P.; Li, X.; Tong, Y.; Ding, H.; Wu, X.; Chu, W.; Peng, Z.; Wu, C.; Xie, Y. Metallic Nickel Nitride Nanosheets Realizing Enhanced Electrochemical Water Oxidation. *J. Am. Chem. Soc.* **2015**, *137*, 4119-4125.
20. Zhang, Y.; Ouyang, B.; Xu, J.; Jia, G.; Shen, S.; Rawat, R.; Fan, H. Rapid Synthesis of Cobalt Nitride Nanowires: Highly Efficient and Low-Cost Catalysts for Oxygen Evolution. *Angew. Chem. Int. Ed.* **2016**, *55*, 8670-8674.
21. Li, D.; Baydoun, H.; Verani, C.; Brock, S. Efficient Water Oxidation Using CoMnP Nanoparticles. *J. Am. Chem. Soc.* **2016**, *138*, 4006-4009.
22. Chen, G.; Hu, Z.; Zhu, Y.; Chen, Z.; Zhong, Y.; Lin, H.; Chen, C.; Tjeng, L.; Zhou, W.; Shao, Z. Ultrahigh-Performance Tungsten-Doped Perovskites for the Oxygen Evolution Reaction. *J. Mater. Chem. A* **2018**, *6*, 9854-9859.
23. Liu, T.; Liu, Q.; Asiri, A.; Luo, Y.; Sun, X. An Amorphous CoSe Film Behaves as An Active and Stable Full Water-Splitting Electrocatalyst under Strongly Alkaline Conditions. *Chem. Commun.* **2015**, *51*, 16683-16686.
